# Supplementary material
Source: publisher site journal article supplement (https://www.dovepress.com/article/312137)
Supplement: Supplementary file 1 [file get_supplementary_file.php]

## Supplemental data

### Supplemental Table

**Table S1.** The primary antibodies for Western blotting

| <b>Antibody</b> | <b>Company</b>            | <b>Catalog</b> | <b>Dilution ratio</b> |
|-----------------|---------------------------|----------------|-----------------------|
| AMPK            | Cell Signaling Technology | 5832           | 1:1000 (WB)           |
| p-AMPK          | Cell Signaling Technology | 2537           | 1:1000 (WB)           |
| TXNIP           | Cell Signaling Technology | 14715          | 1:1000 (WB)           |
| $\beta$ -actin  | Cell Signaling Technology | 4970           | 1:1000 (WB)           |

# Supplemental Figures

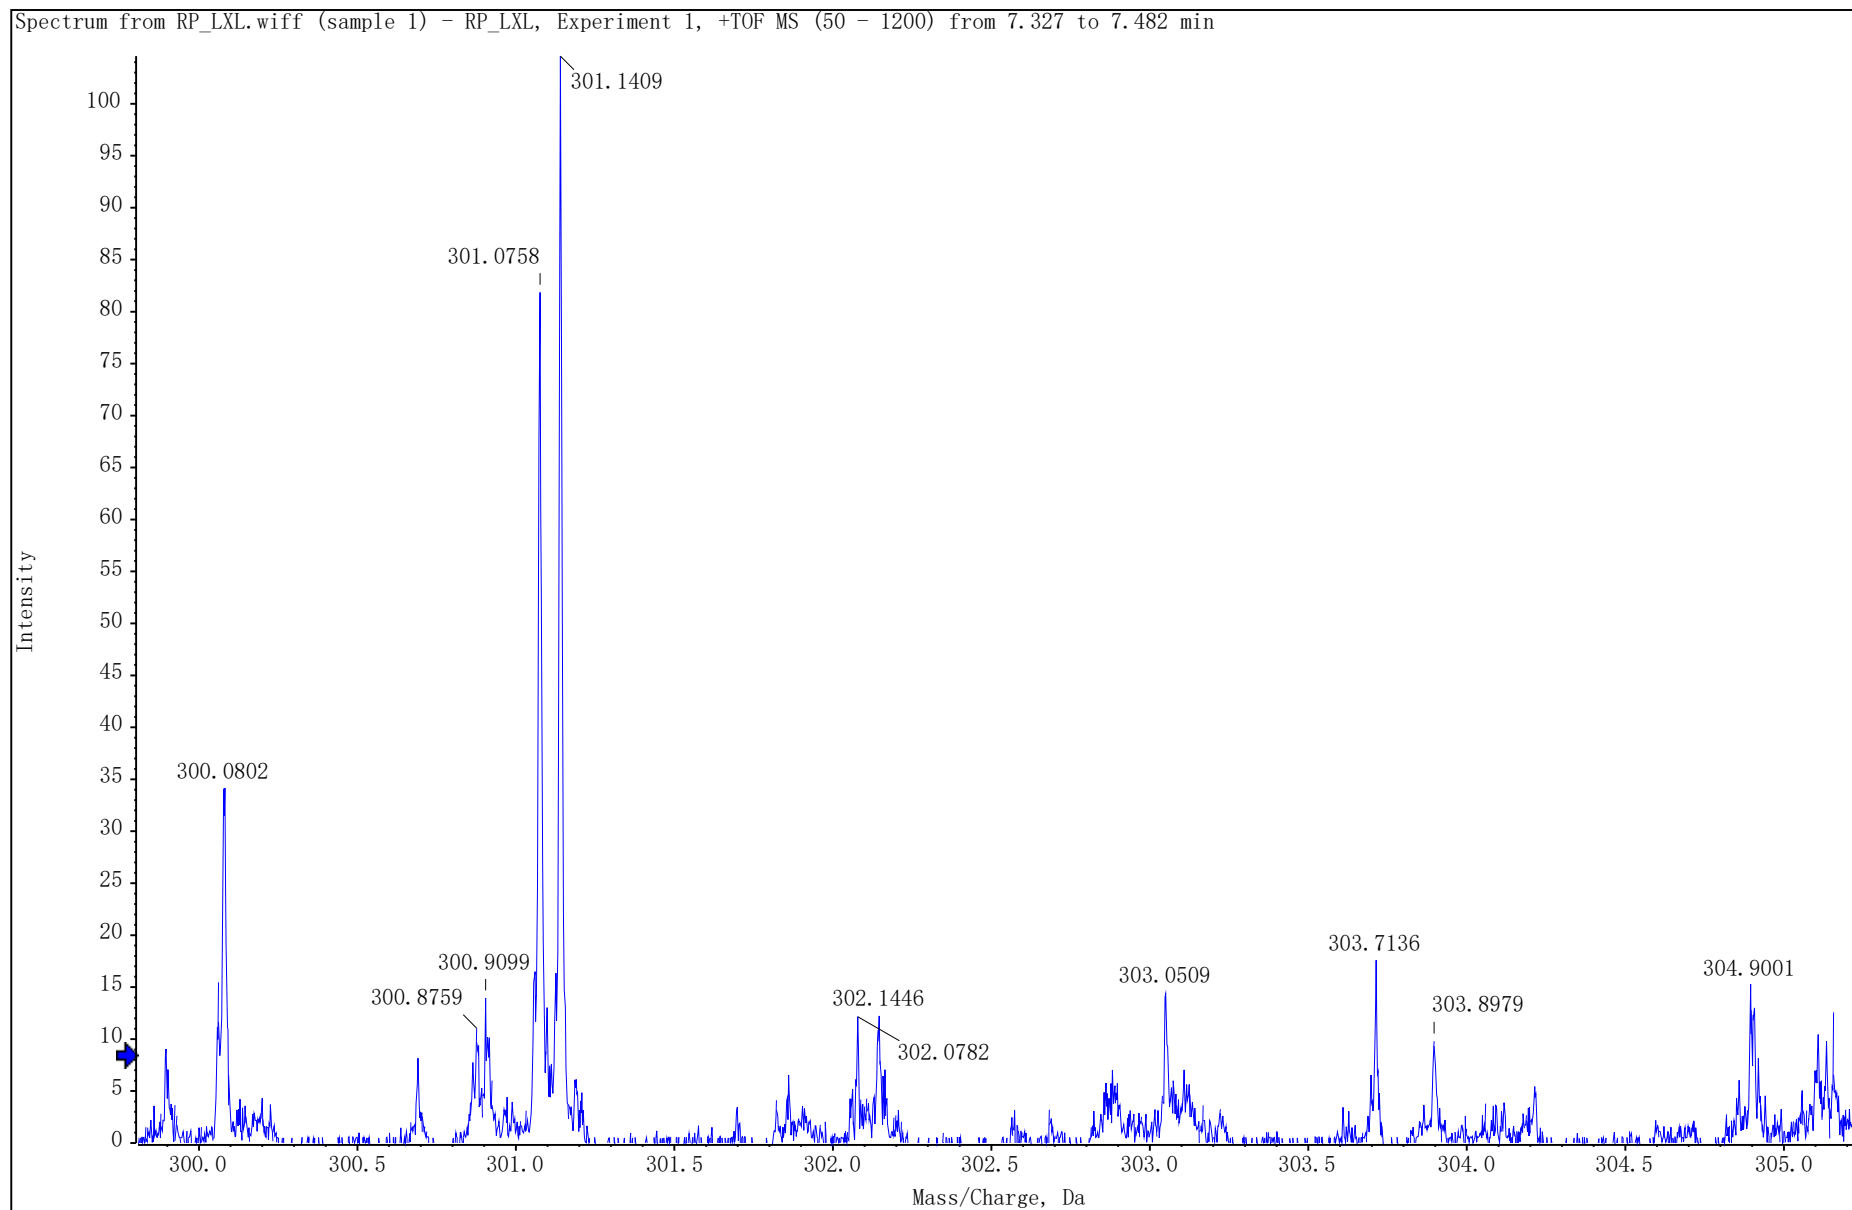

Figure S1. The mass spectrum of Quercetin.

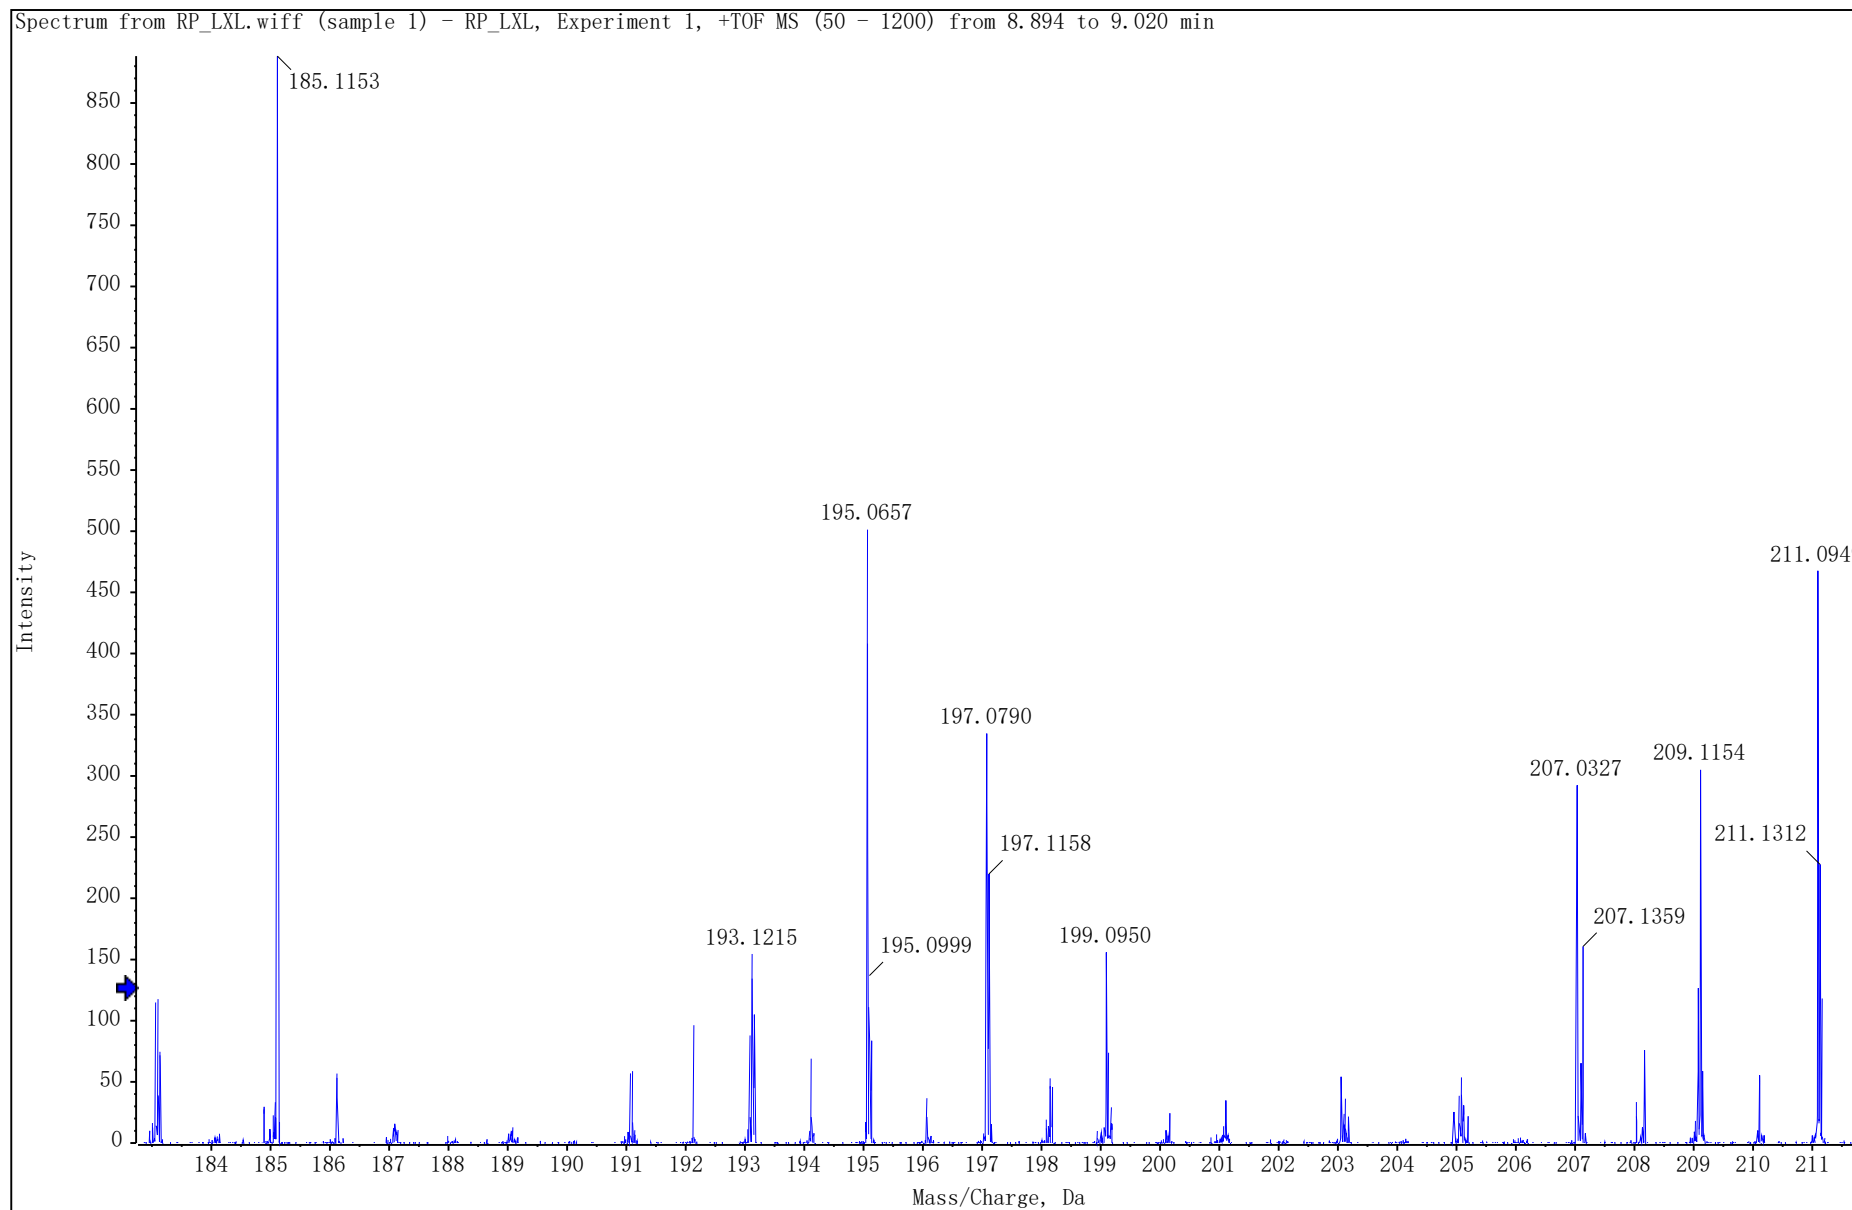

Figure S2. The mass spectrum of Ferulic acid.

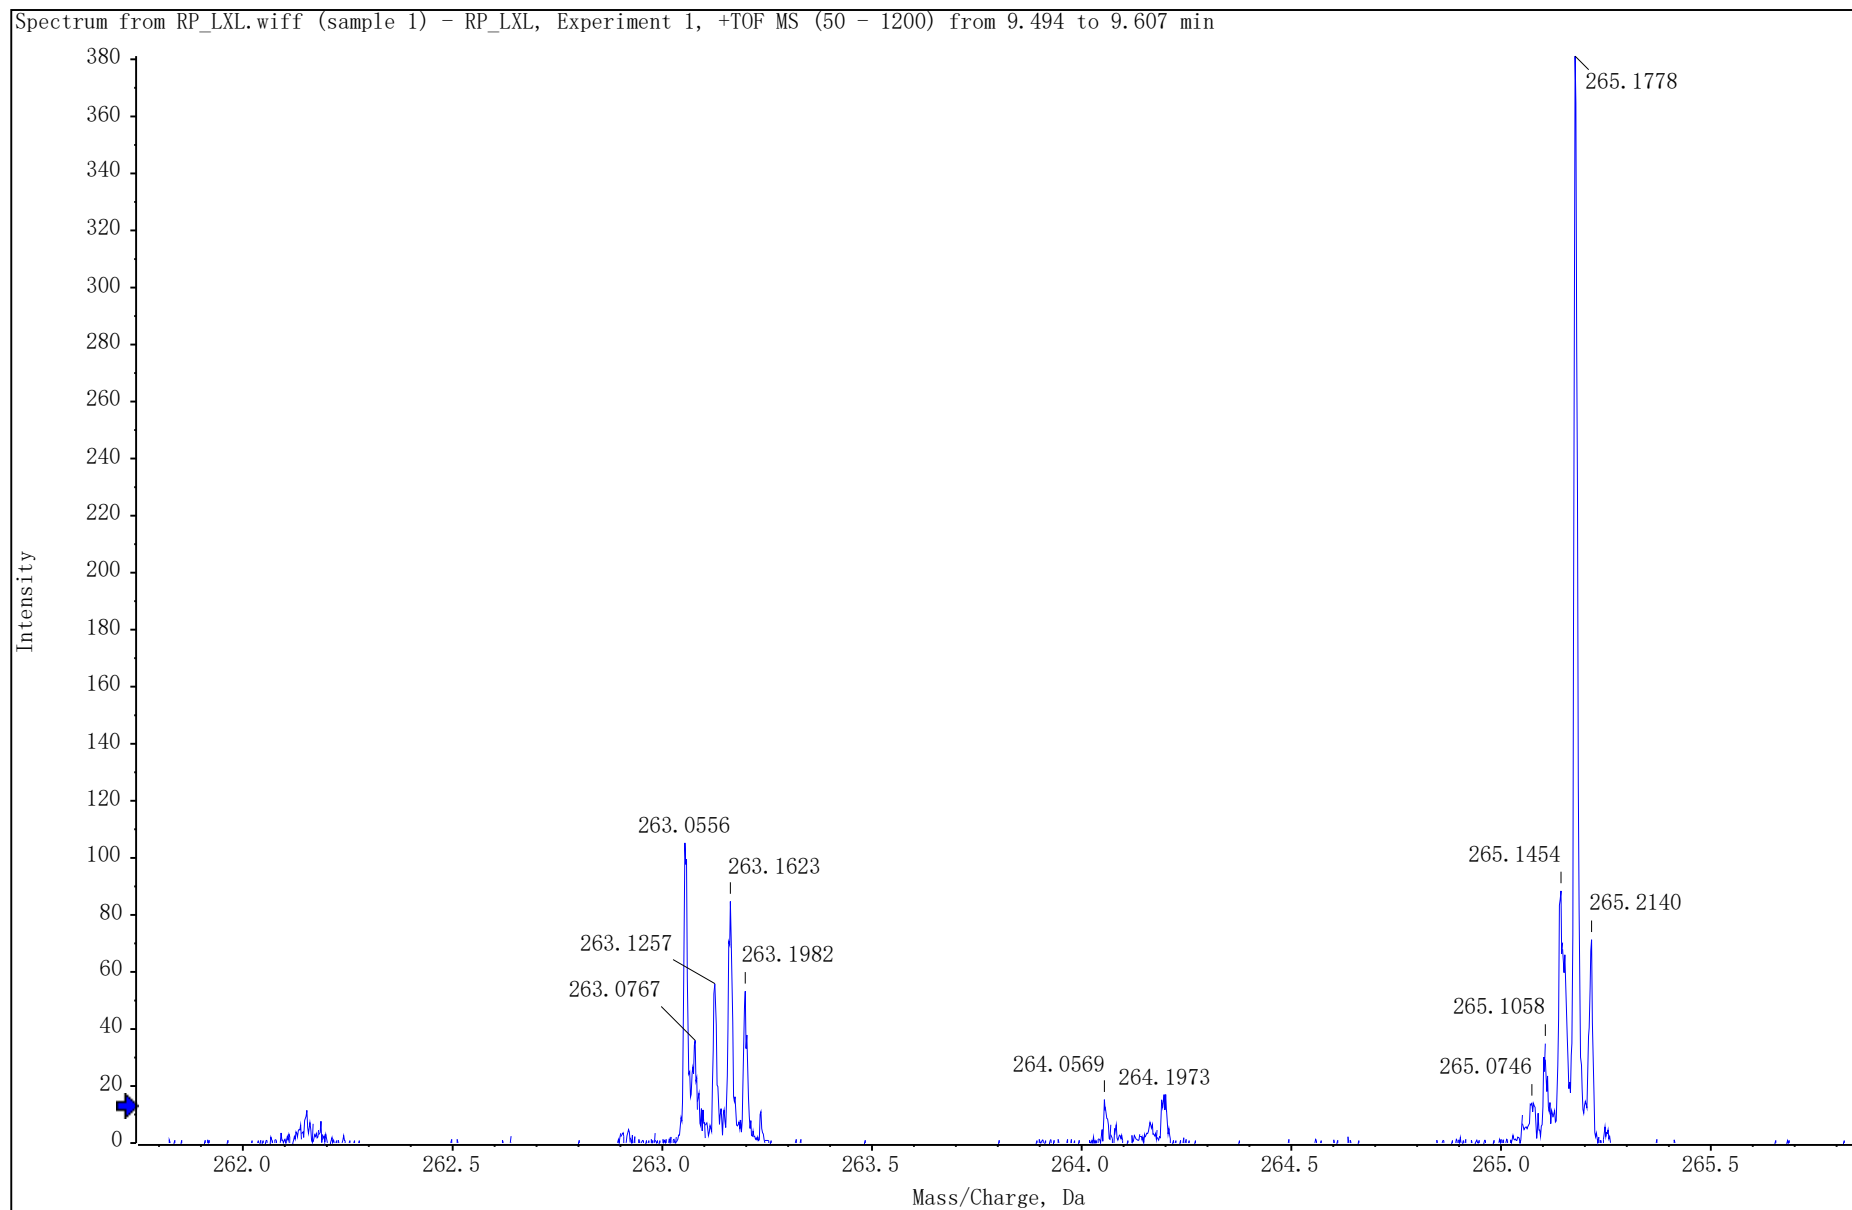

Figure S3. The mass spectrum of Dendrobine.

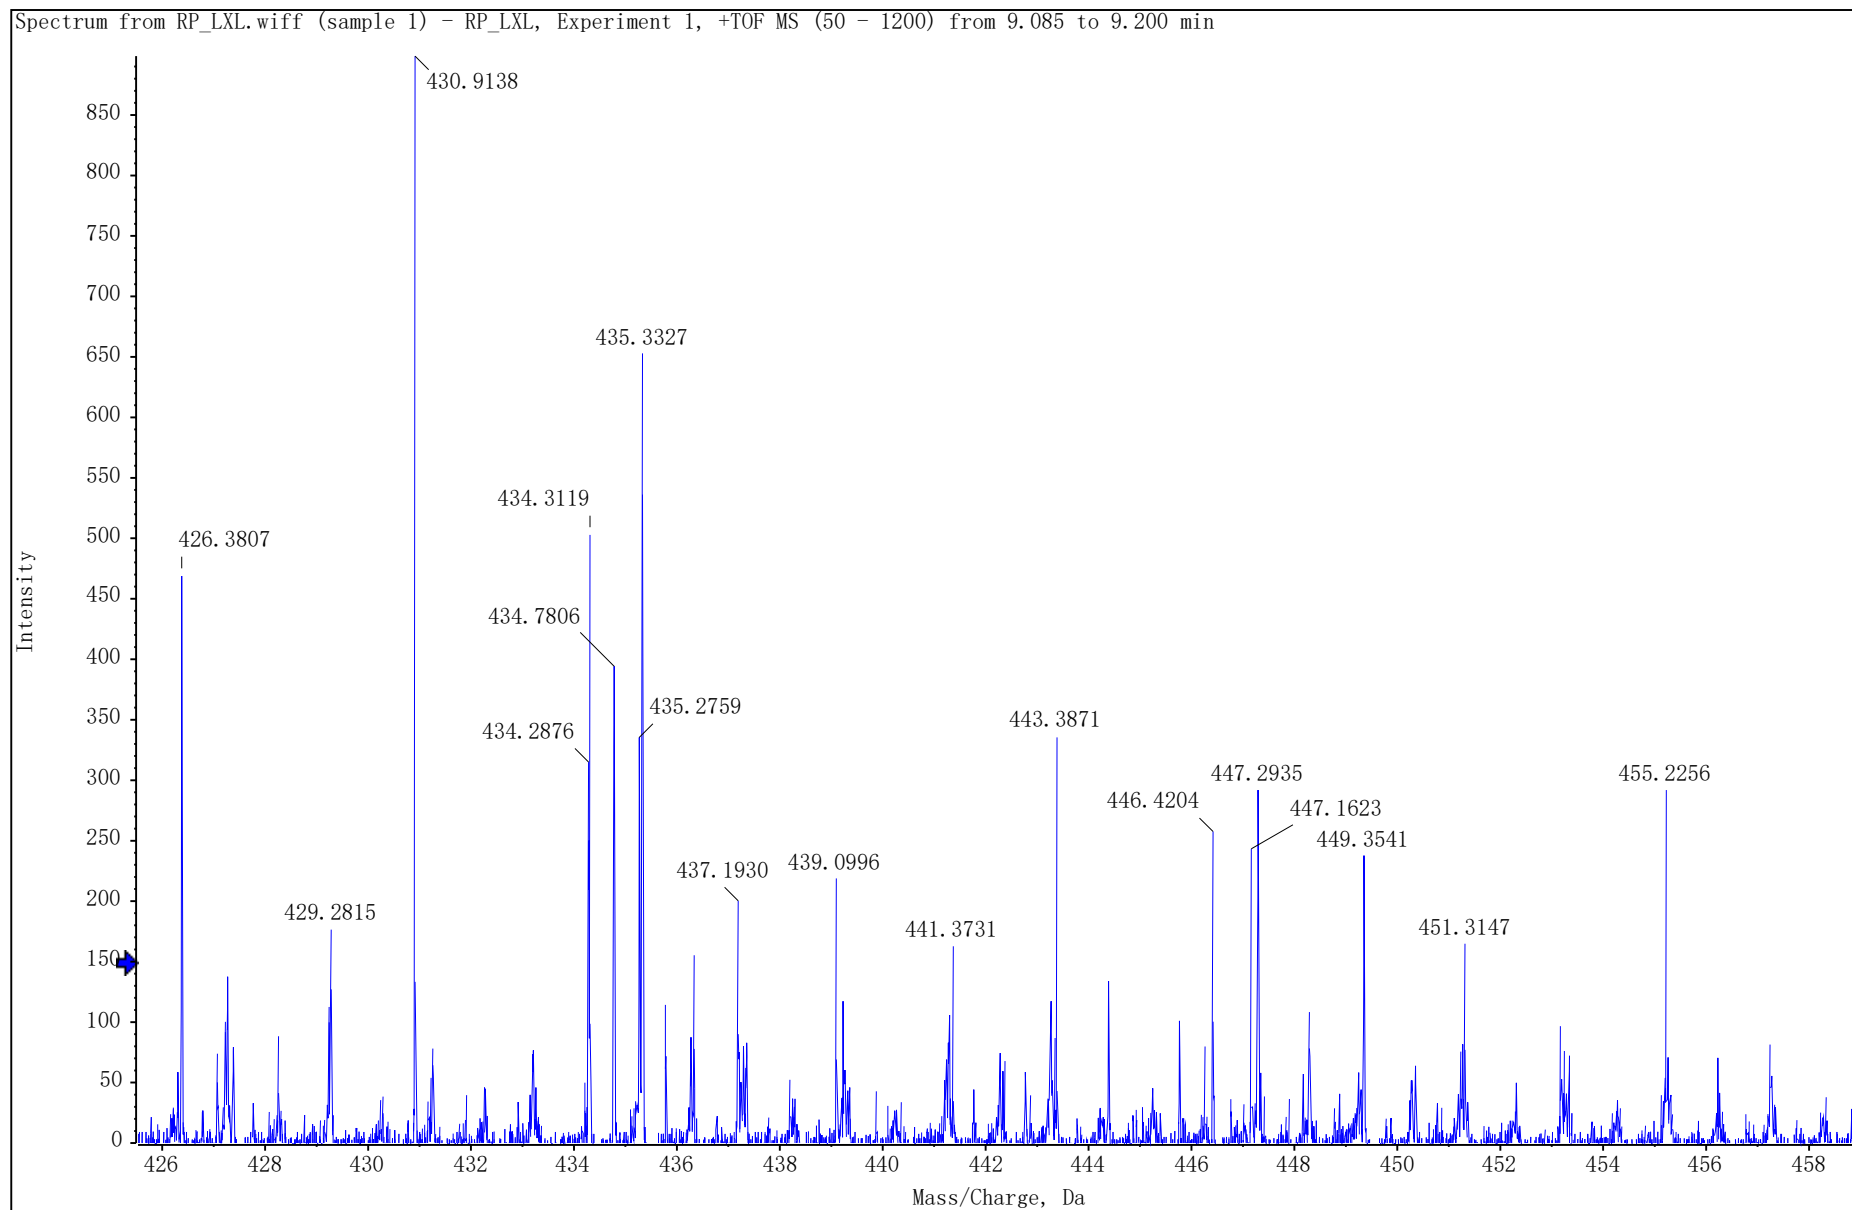

Figure S4. The mass spectrum of Sophoradiol.

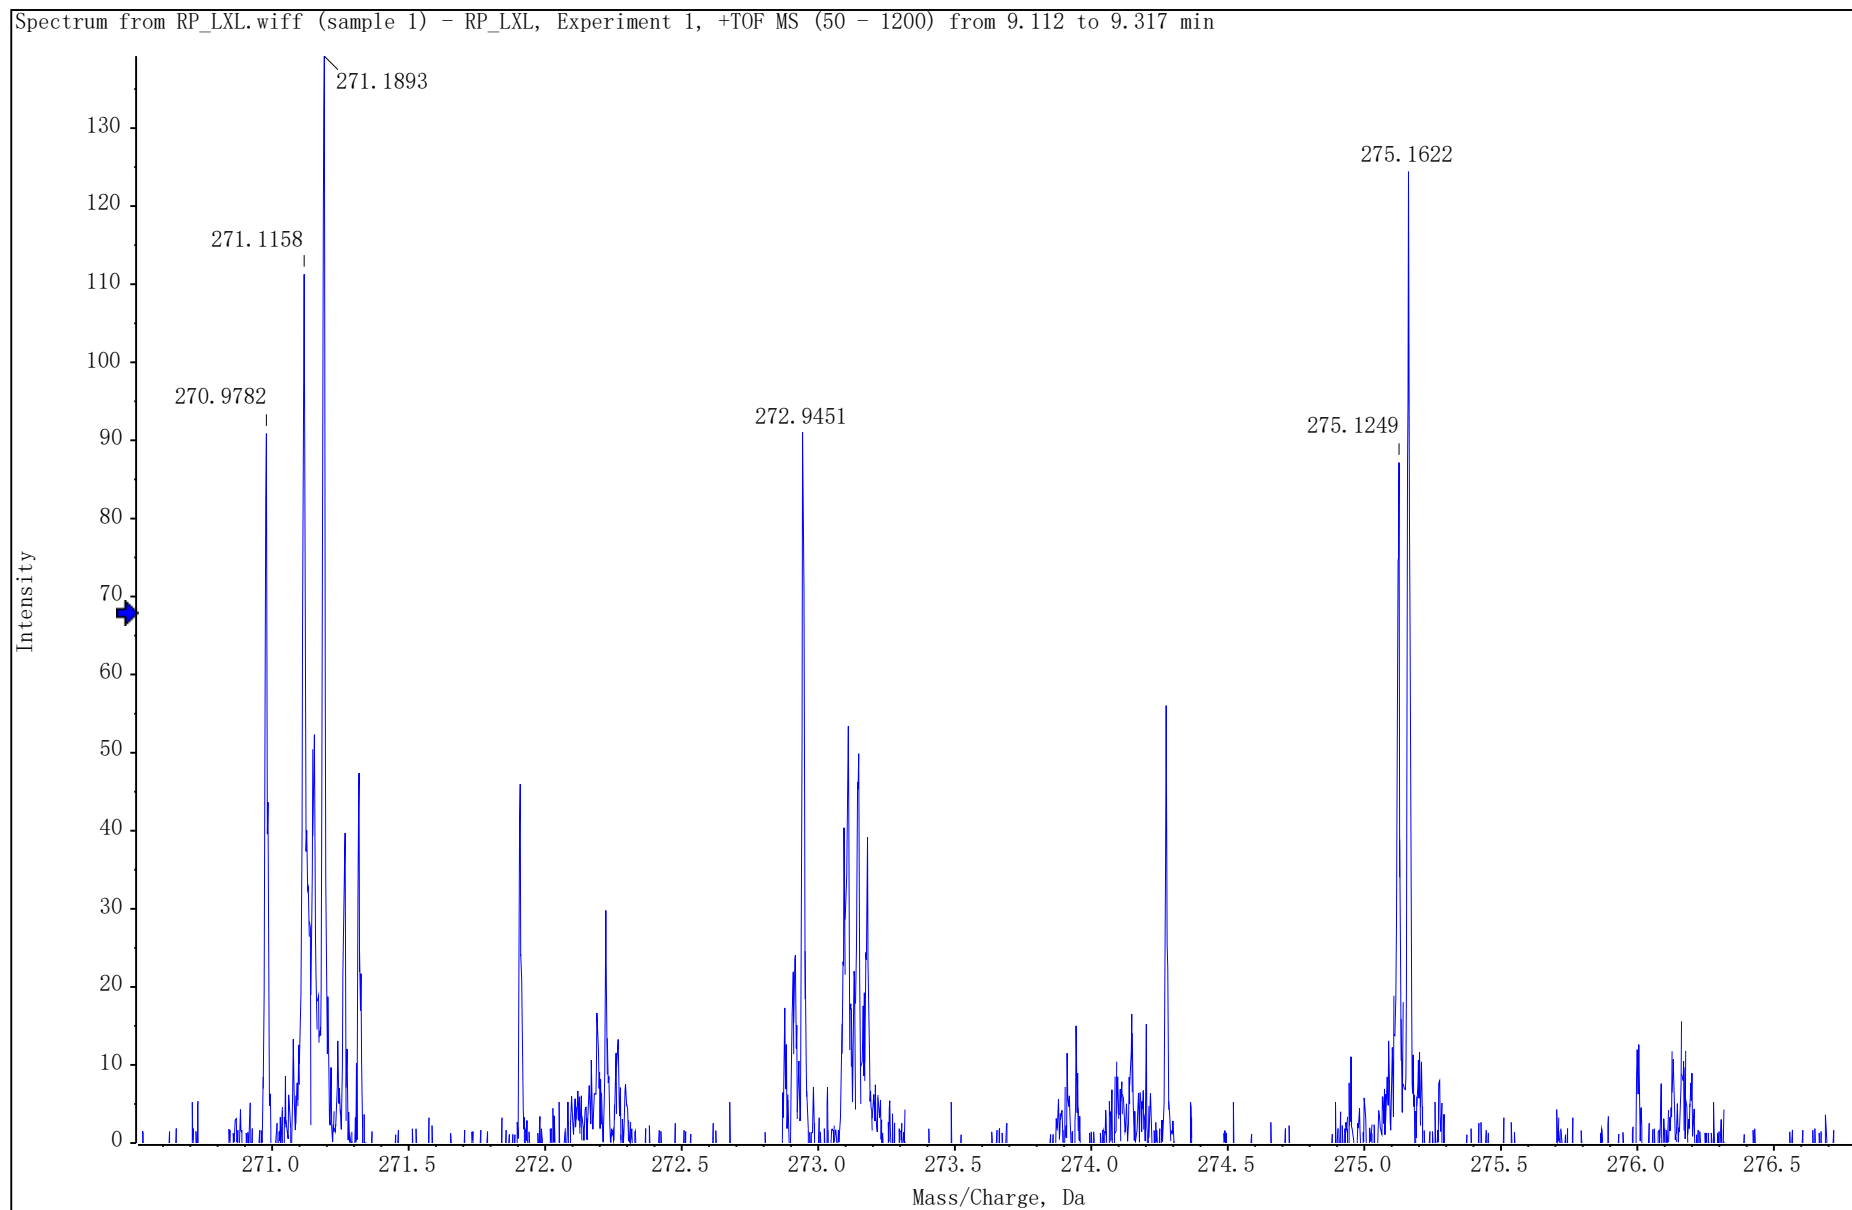

Figure S5. The mass spectrum of Gigantol.

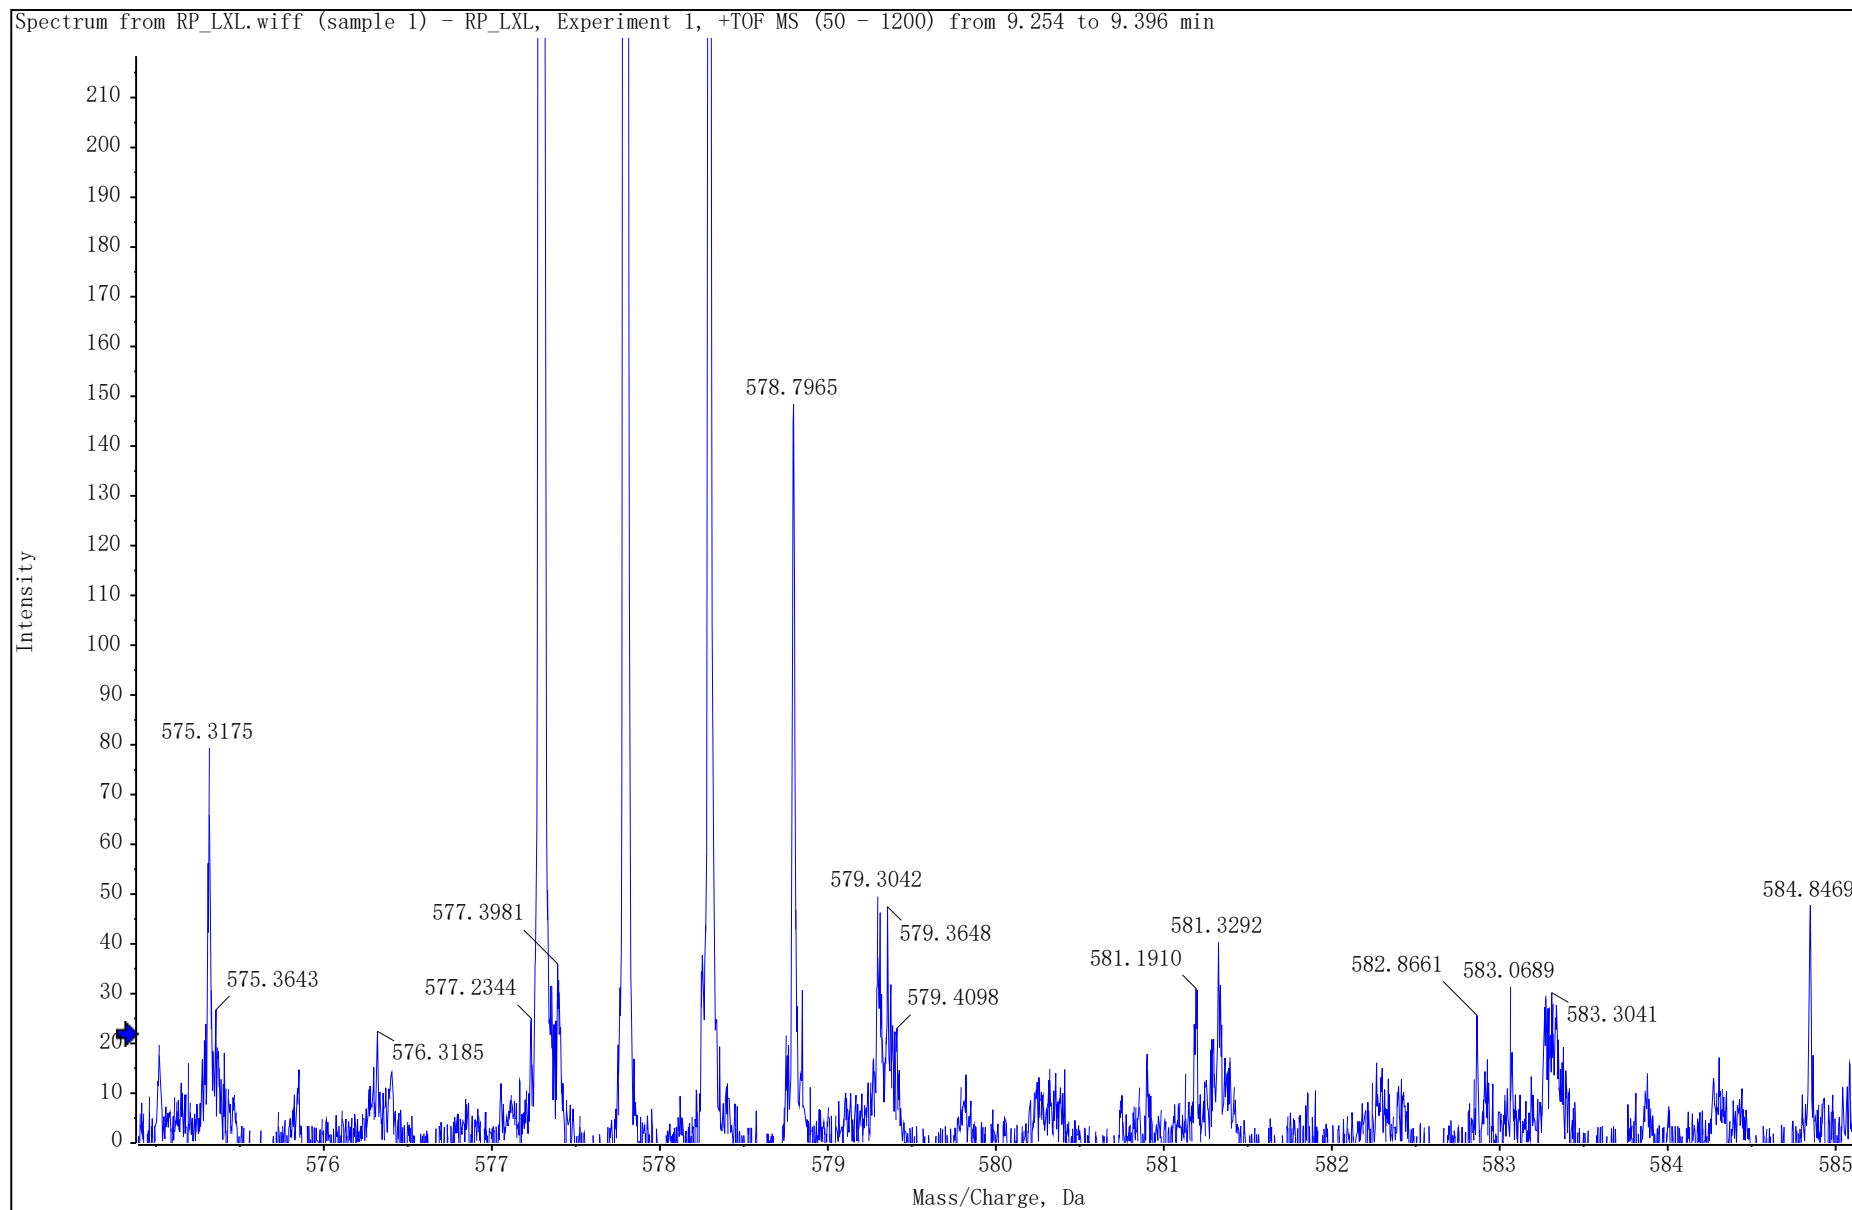

Figure S6. The mass spectrum of Naringin.

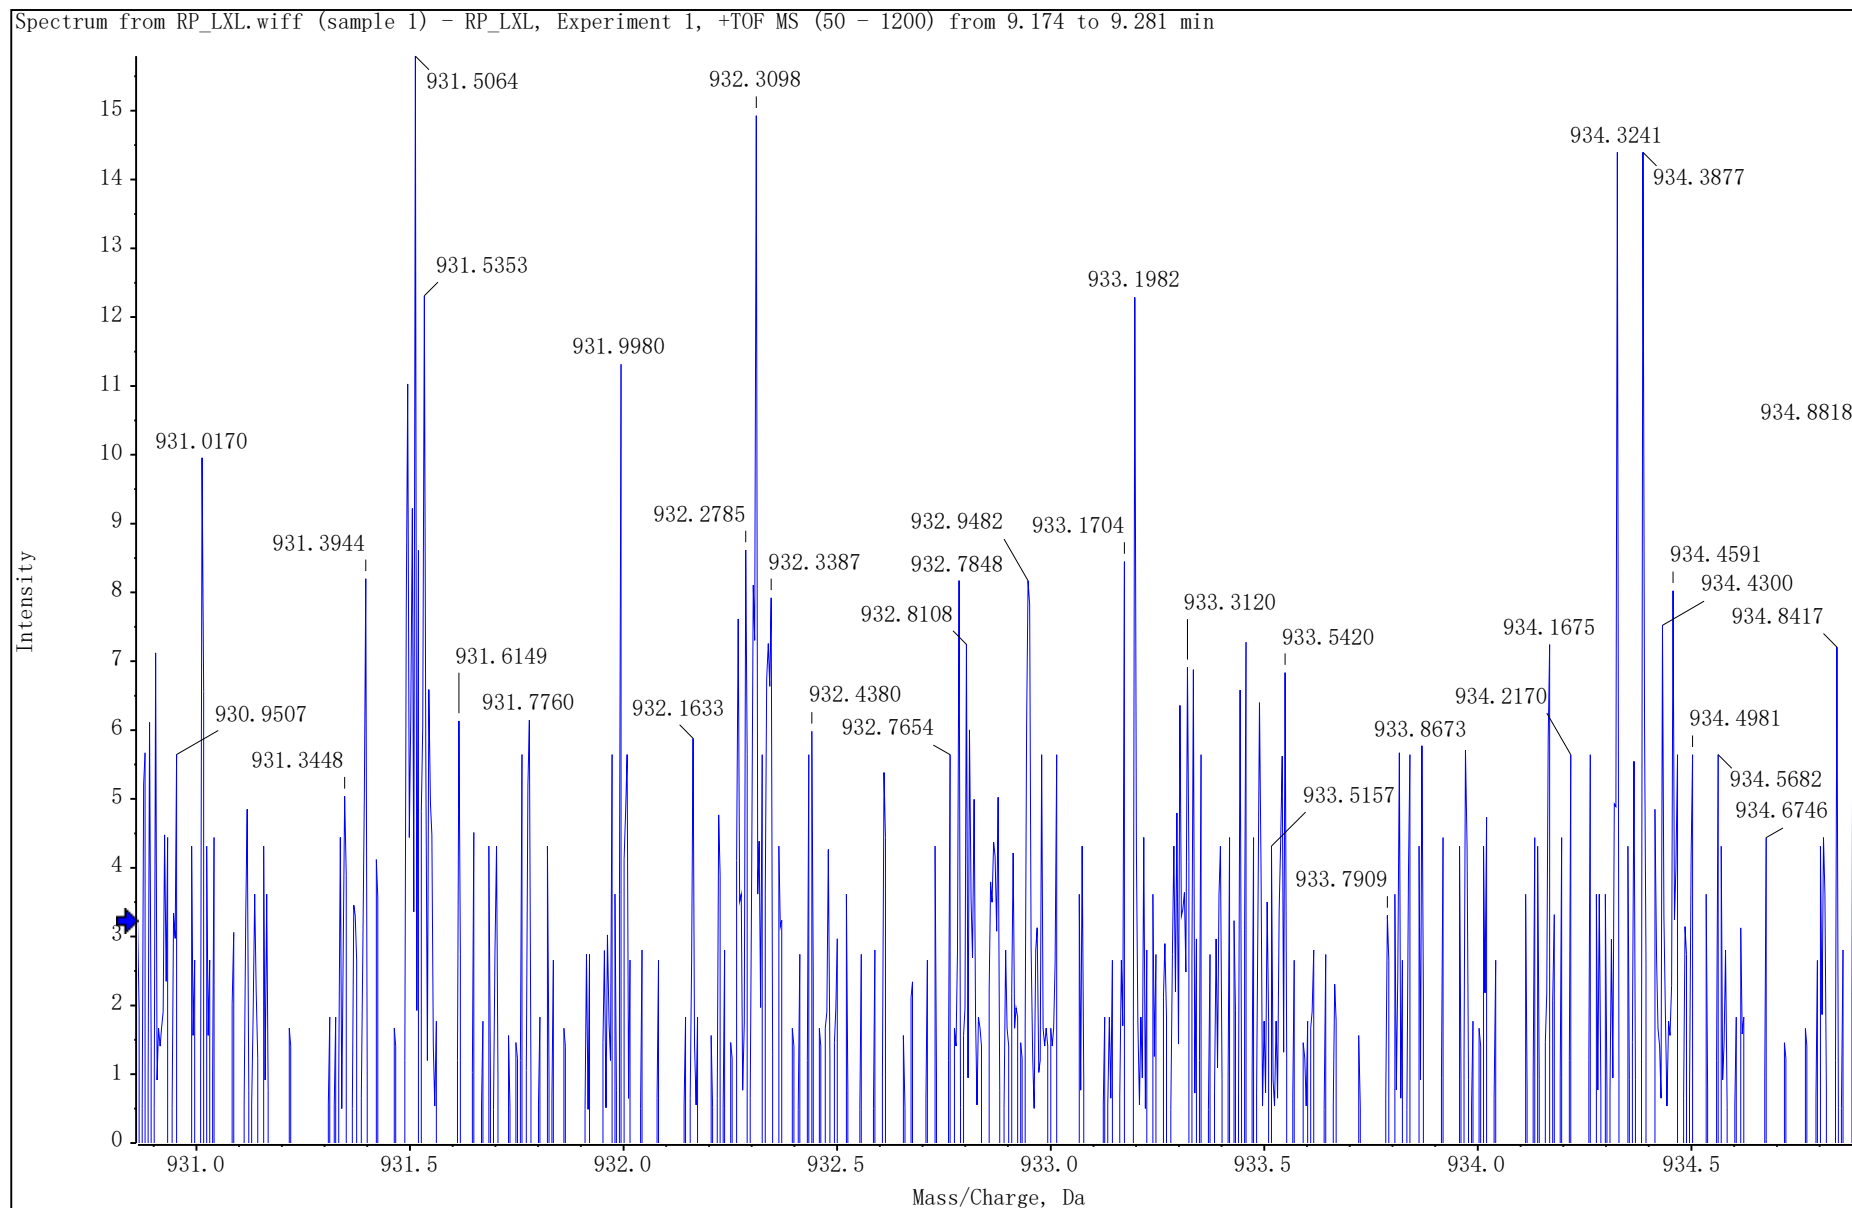

Figure S7. The mass spectrum of Notoginsenoside R1.



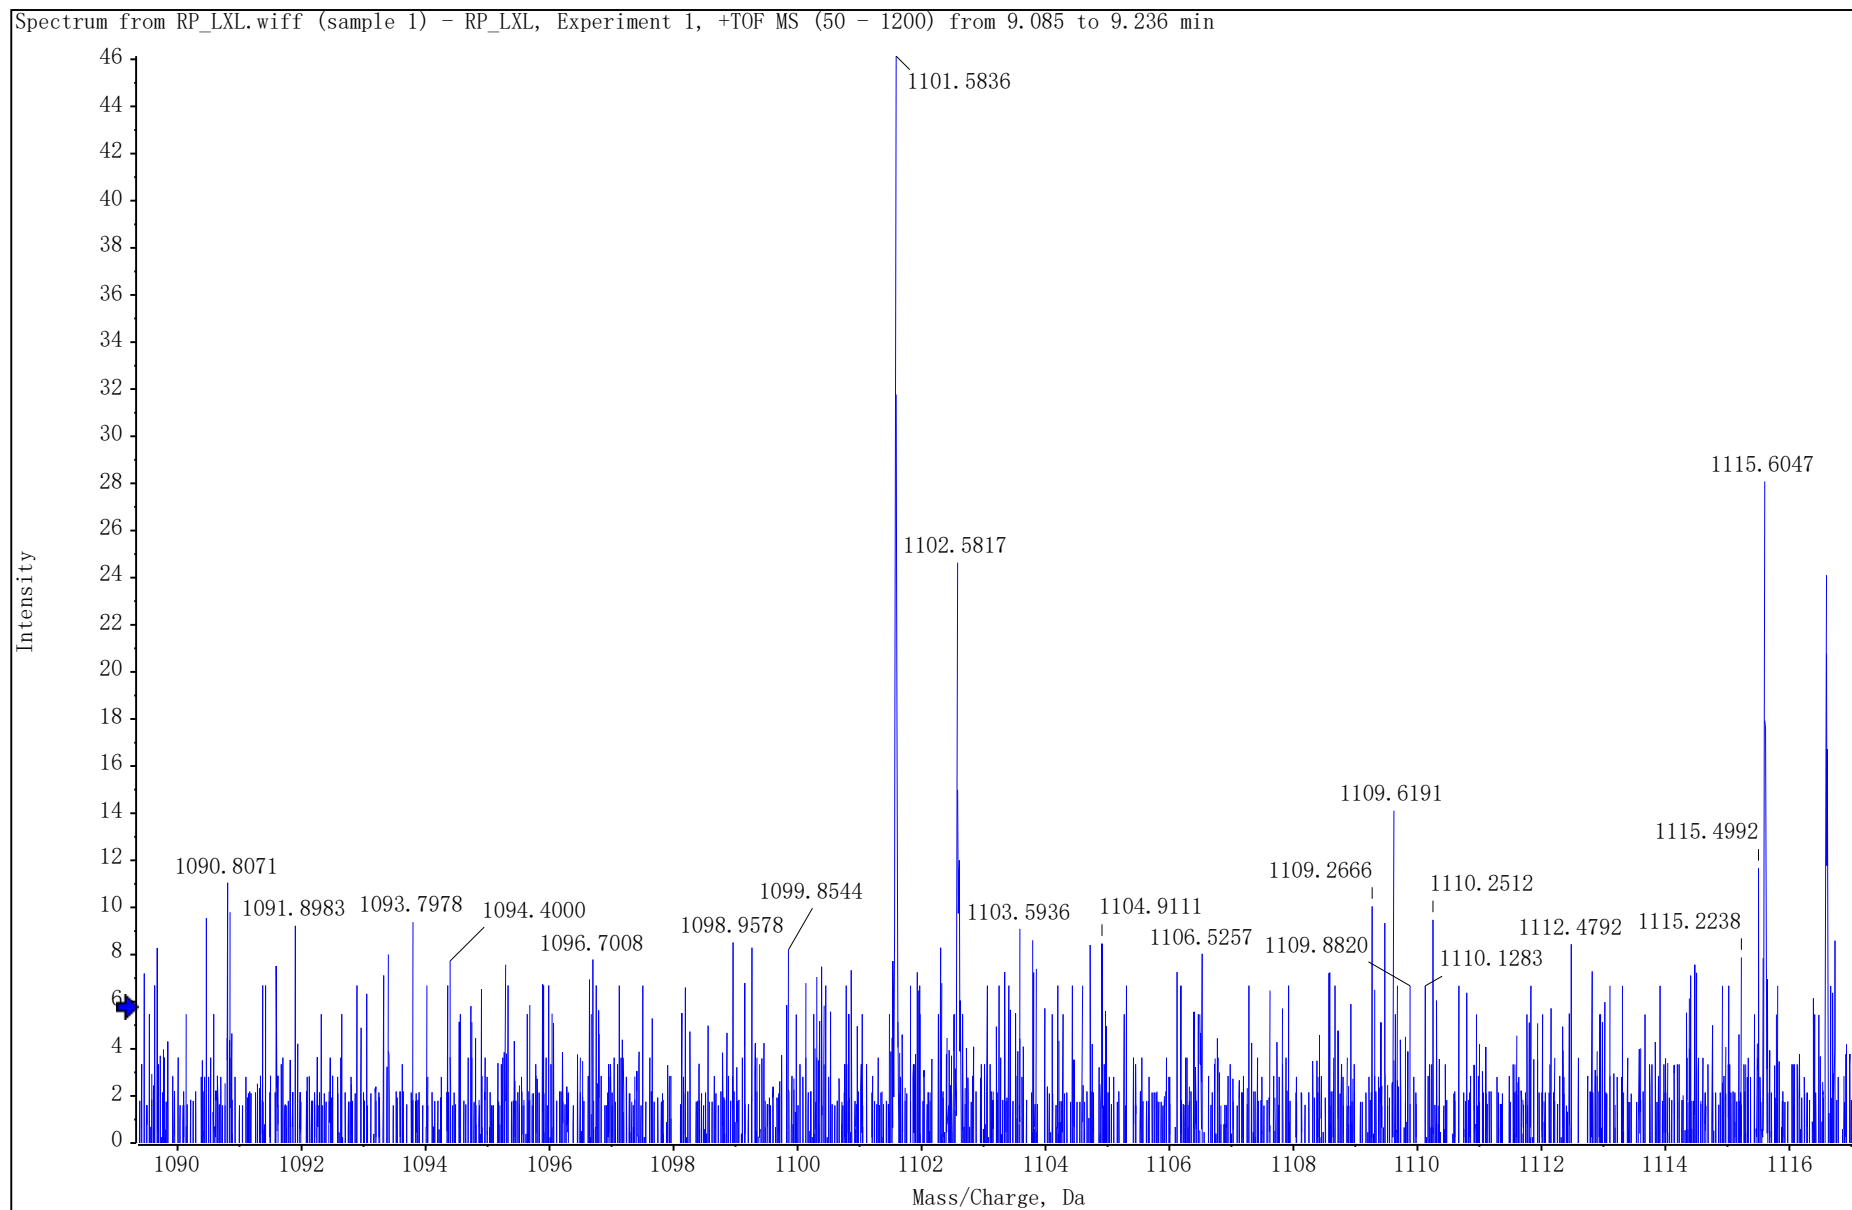

Figure S8. The mass spectrum of Ginsenoside Rb1.
